# Supplementary material for: The predictive role of preoperative serum glutamate dehydrogenase levels in microvascular invasion and hepatocellular carcinoma prognosis following liver transplantation—a single center retrospective study
Source: PeerJ. 2021 Nov 3;9:e12420. doi: 10.7717/peerj.12420 (PMC8571956; doi:10.7717/peerj.12420)
Supplement: Supplemental Information 1 [file peerj-09-12420-s001.xlsx]

## Sheet: Sheet1
patient N.O	status(1survival,2censored）	death date	LT date	last follow-up date	recurrence(1Y,2N)	recurrence date	sex(1M,2F)	age(1≤60,2＞60)	AFP(ug/L,1≤200,2＞200)	HBsAg(1-,2+)	diameter(cm,1≤5,2＞5)	MVI(1-,2+)	stage(1:I-II,2:III-IV）	post-operative hospital day(d)	PA(mg/L)	CA125(U/ml)	A/G	NO of tumor-image(1single,2multiple)	cirrihosis-image（1y,0n）	TB(umol/L)	ALT(U/L)	GLDH(U/L)
1	1	2019-01-01	2015-02-01	2019-01-01	1	2018-05-01	1	2	1	2	2	1	1	36	140	109.3	1.1	2	1	26.8	65	22.7
2	2		2016-07-01	2020-08-01	2		1	2	1	2	1	1	1	26	96	41.3	1.4	1	1	59.8	19	1.8
3	2		2016-05-01	2020-12-01	2		1	2	1	2	1	1	1	25	146	12	1.3	2	1	31.3	12	6.2
4	2		2014-12-01	2020-12-01	2		1	1	1	2	1	1	1	24	221	4.9	1.9	1	1	15.1	66	41.6
5	2		2015-01-01	2020-12-01	2		1	1	1	2	1	1	1	32	41	4854.8	0.8	1	1	33.6	34	3.4
6	2		2015-03-01	2020-12-01	2		1	1	1	2	1	1	1	24	83	70.1	1	2	1	23.8	31	5.1
7	1	2016-09-01	2015-07-01	2016-09-01	1	2015-12-01	1	1	2	2	2	1	1	22	50	119.1	1.2	2	1	22.4	4	5.4
8	1	2018-08-01	2015-07-01	2018-08-01	1	2017-07-01	1	2	1	2	2	1	1	22	43	528.1	1.6	2	1	135.1	26	6.8
9	2		2015-11-01	2020-12-01	2		1	1	1	2	2	1	2	29	113	14.7	1.2	1	1	16.5	20	13.9
10	2		2015-08-01	2020-12-01	2		1	2	1	2	1	1	1	36	66	283	1.1	2	1	39.7	10	3.2
11	2		2015-10-01	2020-12-01	1	2019-04-01	1	2	1	2	2	2	1	35	164	38.6	1	1	0	22.5	74	187.7
12	1	2016-11-01	2015-12-01	2016-11-01	1	2016-06-01	1	1	2	2	2	2	1	21	153	7.1	1.7	2	1	10.6	13	11
13	2		2015-12-01	2020-09-01	2		1	1	1	2	1	1	1	22	85	173.1	1.2	2	1	21.1	41	11.8
14	2		2016-01-01	2020-12-01	2		1	2	1	2	1	1	2	28	51	163	0.9	2	1	37.3	28	3.4
15	2		2016-04-01	2020-12-01	2		1	2	2	2	2	1	1	39	83	28.5	0.8	1	1	41.2	22	92.8
16	1	2017-04-01	2016-03-01	2017-04-01	1	2017-01-01	1	1	1	2	2	2	1	29	47	756.7	0.7	2	1	109	29	3.3
17	2		2016-03-01	2020-12-01	2		1	1	1	2	2	1	2	28	118	169.2	1.4	2	1	26.9	42	3.5
18	2		2016-04-01	2020-12-01	2		0	1	2	1	1	1	1	52	77	21.2	1.2	2	1	38.7	19	1.3
19	2		2016-09-01	2020-12-01	2		1	1	1	2	1	2	1	19	104	545.5	1.3	2	1	44.2	29	4.4
20	1	2018-04-01	2017-03-01	2018-04-01	1	2017-08-01	1	2	2	2	2	1	1	19	70	47.9	0.9	1	1	77.3	29	23.3
21	2		2016-09-01	2020-12-01	2		1	1	1	2	2	1	1	46	92	36.9	1.2	1	1	53.3	7	3.6
22	1	2019-02-01	2016-12-01	2019-02-01	1	2019-01-01	1	2	2	2	2	1	1	29	100	61.9	1.2	1	0	11.4	30	7
23	1	2019-02-01	2016-12-01	2019-02-01	1	2018-01-01	1	2	1	2	2	2	1	22	75	1966.4	0.8	1	1	37.6	56	9.7
24	2		2017-01-01	2020-12-01	1	2019-05-01	1	1	1	2	1	1	1	20	166	281.8	1.5	1	1	245.5	118	4.8
25	1	2017-12-01	2017-02-01	2017-12-01	2		1	1	2	2	2	2	1	39	160	17.2	1.3	1	0	41.2	33	9.7
26	1	2019-07-01	2017-02-01	2019-07-01	1	2017-12-01	1	1	2	2	2	2	1	20	88	693.9	1	1	1	114	38	918.8
27	1	2017-12-01	2017-03-01	2017-12-01	1	2017-07-01	1	1	2	2	2	2	2	23	100	30.1	1	1	1	24.6	24	4.7
28	2		2017-03-01	2020-12-01	2		1	1	1	2	2	2	2	18	49	1461	1.9	1	1	84.3	9	3.5
29	1	2018-12-01	2017-03-01	2018-12-01	1	2018-01-01	1	2	1	1	1	2	1	18	73	447.1	1	1	1	42.5	8	7.6
30	2		2017-03-01	2020-12-01	2		1	2	2	2	2	1	2	30	51	83	1	2	1	48.2	59	14.6
31	2		2017-05-01	2020-12-01	2		1	2	1	2	1	1	1	29	147	25.9	1	2	1	40.9	36	5.6
32	2		2017-05-01	2020-12-01	2		1	2	1	1	1	1	1	25	95	20.9	0.9	2	1	34.2	52	9.2
33	2		2017-06-01	2020-11-01	1	2019-01-01	1	2	1	2	1	1	1	18	155	21.4	1.8	2	1	44	21	2.5
34	1	2018-12-01	2017-06-01	2018-12-01	1	2018-02-01	0	1	2	2	2	1	1	46	88	28.2	2.2	2	0	36.5	64	17.9
35	2		2017-07-01	2020-12-01	2		0	1	1	2	1	1	1	15	38	12.6	1.2	1	1	60.9	41	3.9
36	2		2017-07-01	2020-12-01	2		1	1	1	2	1	1	1	23	54	390	1.2	1	1	13.5	20	3.1
37	2		2017-09-01	2020-12-01	2		1	1	1	2	1	1	1	28	68	32	1.7	1	1	78	245	4.1
38	1	2019-03-01	2017-10-01	2019-03-01	1	2017-12-01	1	2	1	2	2	2	1	15	178	10	1	1	0	15.5	42	18.9
39	2		2017-11-01	2020-12-01	2		1	1	1	2	1	1	1	23	58	12	1.6	2	1	40.8	8	9.1
40	2		2017-11-01	2020-11-01	1	2018-05-01	1	1	2	2	1	2	2	21	177	10.1	1.5	2	1	14.2	39	19.9
41	1	2019-06-01	2017-11-01	2019-06-01	1	2018-02-01	1	1	2	2	2	2	2	68	204	21.7	2.1	2	0	14.8	34	8.2
42	2		2018-02-01	2020-12-01	2		0	2	1	2	1	1	1	25	66	779.7	1.6	1	1	299.3	11	2
43	2		2018-02-01	2020-12-01	2		1	2	2	2	1	2	1	19	99	419.5	1	1	1	39.7	17	28.6
44	2		2018-03-01	2020-12-01	2		1	1	1	2	1	1	1	49	59	528.5	2.2	1	1	584	34	1.7
45	1	2019-03-01	2018-04-01	2019-03-01	1	2018-09-01	1	1	1	2	2	1	1	14	203	71.8	1.5	2	0	62.7	134	25.6
46	2		2018-06-01	2020-12-01	2		1	2	1	1	1	1	2	50	64	322.5	1.9	1	1	44.4	10	3.9
47	2		2018-08-01	2020-12-01	2		1	2	1	2	2	2	2	16	114	18.3	0.8	1	1	37.5	112	10.3
48	2		2018-08-01	2020-07-01	2		1	1	1	2	2	1	1	28	103	86.4	0.9	1	1	14.7	14	3.6
49	1	2019-10-01	2018-09-01	2019-10-01	1	2019-02-01	1	1	1	2	2	2	2	12	177	7	1.7	1	1	12.6	18	38.5
50	1	2019-08-01	2018-09-01	2019-08-01	2		0	1	1	2	1	1	2	24	66	23.6	0.7	1	1	21.3	31	9.1
51	2		2018-10-01	2020-12-01	2		1	1	1	2	1	1	1	21	149	10.8	1.2	2	1	32.9	26	7.3
52	2		2018-09-01	2020-12-01	2		1	1	1	2	1	1	1	26	60	9	1	1	1	17.1	13	4.5
53	2		2018-10-01	2020-12-01	2		1	1	1	2	1	1	1	23	128	12.3	0.9	1	1	73.4	17	7
54	2		2018-10-01	2020-12-01	2		1	1	2	2	1	1	1	15	103	448.1	3	1	1	471.3	46	4.1
55	2		2018-10-01	2020-11-01	2		1	1	1	2	1	1	1	15	50	1200.9	0.8	1	1	58.9	166	18.1
56	2		2018-11-01	2020-11-01	2		1	1	2	1	1	1	2	14	250	7.8	1.14	1	0	186.4	191	10.8
57	2		2018-12-01	2020-12-01	2		1	1	1	1	1	1	1	26	74	18.9	0.6	1	1	65.6	36	2.4
58	2		2018-12-01	2020-12-01	2		1	1	1	2	1	1	1	24	101	25.1	1.2	1	1	19.9	39	5.8
59	2		2018-11-01	2020-12-01	2		1	1	1	2	1	1	1	21	192	16.5	1.6	2	1	22.8	52	4.9
60	2		2018-12-01	2020-12-01	1	2019-08-01	1	1	1	2	2	2	1	34	174	39.7	1.5	1	0	18.5	147	43.6
61	1	2019-06-01	2018-12-01	2019-06-01	1	2019-03-01	1	1	2	2	2	2	2	13	168	21.4	1	2	0	20.2	36	16.4
62	1	2019-07-01	2019-02-01	2019-07-01	1	2019-04-01	1	1	2	2	2	2	2	14	61	200.8	0.9	2	0	18.7	26	6.2
63	2		2019-03-01	2020-12-01	2		1	1	1	2	1	1	2	19	92	1083.7	0.9	1	1	76.7	49	5.7
64	2		2019-04-01	2020-09-01	2		1	1	1	2	1	1	2	29	95	28.3	1.12	1	1	72.8	41	10.1
65	2		2019-04-01	2020-12-01	2		1	1	1	2	2	2	2	19	91	54.7	0.8	2	1	38.5	99	29.1
66	1	2019-12-01	2019-04-01	2019-12-01	1	2019-08-01	1	1	2	2	2	2	2	13	207	160.9	1.4	2	1	17.6	72	22.7
67	1	2020-01-01	2019-04-01	2020-01-01	2		1	1	1	2	1	1	1	21	89	280.9	1.3	2	1	25.2	29	7.9
68	2		2019-05-01	2020-12-01	2		1	1	1	2	1	1	2	20	78	37.5	1.2	1	1	27.2	38	8.3
69	2		2019-04-01	2020-11-01	2		1	1	1	2	1	1	1	27	58	152.9	1.2	2	1	92.4	20	2.2
70	2		2019-05-01	2020-11-01	2		1	1	1	2	1	1	1	30	171	22.4	1.7	2	1	27	40	39.8
71	2		2019-05-01	2020-11-01	1	2019-09-01	1	1	2	2	2	2	1	33	43	1392.1	0.7	2	1	53.8	26	9.2
72	2		2019-06-01	2020-12-01	2		1	1	1	2	1	1	1	122	85	256.5	1.6	1	1	40.8	17	5.7
73	2		2019-07-01	2020-11-01	2		1	1	1	2	1	1	1	32	61	12.6	1	1	1	53.3	23	4.2
74	2		2019-09-01	2020-11-01	2		1	1	1	2	1	1	1	15	101	76.7	1.1	1	1	15	23	4.5
75	1	2020-12-01	2019-10-01	2020-12-01	1	2020-11-01	1	2	1	2	2	1	1	14	115	525.8	1.34	2	1	23.1	21	8.4
76	2		2019-09-01	2020-12-01	2		0	1	1	2	1	1	1	16	71	49.3	0.92	1	1	52.7	30	6.3
77	2		2019-08-01	2020-12-01	2		1	1	2	1	1	1	1	27	75	705.6	0.5	1	1	20.3	8	7.7
78	2		2019-10-01	2020-11-01	1	2020-05-01	1	1	2	2	2	2	1	21	100	765.1	0.7	2	1	43.9	49	10.1
79	2		2019-12-01	2020-12-01	2		1	1	1	2	1	1	2	18	96	62.4	1	2	1	14.4	28	10.7
80	2		2019-12-01	2020-12-01	2		1	2	1	1	2	1	1	23	365	23.8	1	1	0	20.7	15	2.8
81	2		2019-12-01	2020-11-01	2		1	1	1	2	2	1	1	25	109	21.9	1.08	2	1	211.8	39	14.8
82	2		2020-01-01	2020-12-01	1	2020-06-01	1	1	2	2	2	2	2	44	119	136.8	1	1	1	30.9	97	16.8
83	2		2020-03-01	2020-12-01	1	2020-09-01	1	1	2	2	2	2	1	21	120	55.2	1.4	2	0	27.3	825	41.4
84	2		2020-03-01	2020-12-01	2		1	1	2	2	1	1	1	57	118	35.8	1.5	1	1	19.7	21	4.7
85	2		2020-03-01	2020-12-01	2		1	1	1	2	2	1	1	15	135	72	1.2	2	1	16.1	54	6.7
86	2		2020-03-01	2020-11-01	2		1	1	1	2	2	2	2	30	107	33.4	0.8	1	0	9	27	8.5
87	1	2020-11-01	2020-04-01	2020-11-01	1	2020-09-01	1	1	2	1	2	2	1	25	127	491.2	1.5	2	1	21.2	32	12.1
88	1	2017-12-01	2015-11-01	2017-12-01	1	2016-11-01	1	1	2	2	2	2	1	25	73	912.3	1.3	2	1	82.3	26	145.4
89	2		2020-04-01	2020-11-01	2		0	1	2	2	1	1	1	16	54	709.3	2.5	1	1	81.8	23	2.5
90	2		2020-05-01	2020-12-01	2		1	2	1	2	2	1	2	17	43	465.7	1.2	2	1	118.1	27	3.9
91	2		2018-11-01	2020-12-01	1	2019-10-01	1	1	2	2	2	2	2	24	66	698.3	1.1	2	1	30	27	3.8
